# Supplementary material
Source: Springer Nature journal article supplement (https://www.springermedizin.de/resource/supplementary/12962_2003_9_MOESM2_ESM.pdf/9571954)

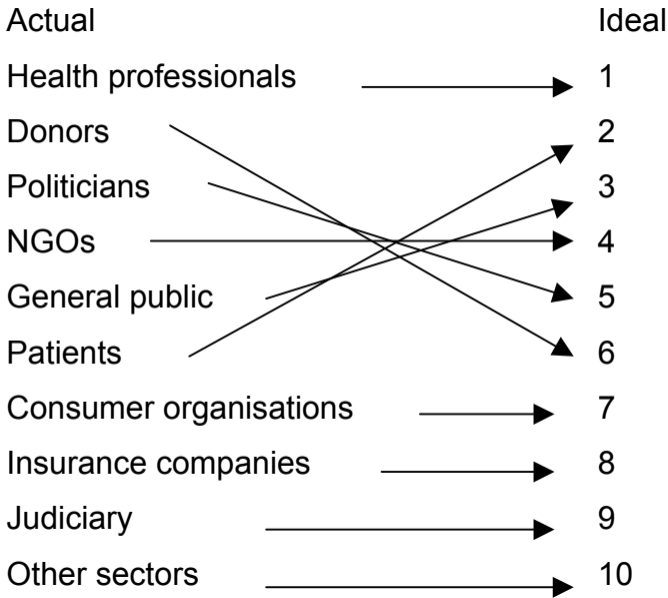

Supplement: MOESM2 [file 9571954]
